# Supplementary material for: Southern Hemisphere atmospheric history of carbon monoxide over the late Holocene reconstructed from multiple Antarctic ice archives
Source: Copernicus journal article supplement (doi:10.5194/cp-2023-9), 2023-04-21
Supplement: Supplementary file 1 [file cp-2023-9-supplement.pdf]

# **Southern Hemisphere atmospheric history of carbon monoxide over the late Holocene reconstructed from multiple Antarctic ice archives**

## **Supplementary Information**

**Xavier Faïn (1), David M. Etheridge (3,4), Kévin Fourteau (2), Patricia Martinerie (1), Cathy M. Trudinger (3,4), Rachael H. Rhodes (5), Nathan J. Chellman (6), Ray L. Langenfelds (3), Joseph R. McConnell (6), Mark A. J. Curran (13, 4), Edward J. Brook (7), Thomas Blunier (8), Grégory Teste (1), Roberto Grilli (1), Anthony Lemoine (1), William T. Sturges (9), Boris Vannière (10, 11), Johannes Freitag (12), Jérôme Chappellaz (1, 14).**

1 Univ. Grenoble Alpes, CNRS, INRAE, IRD, Grenoble INP, IGE, 38000 Grenoble, France

2 Univ. Grenoble Alpes, Université de Toulouse, Météo-France, CNRS, CNRM, Centre d'Études de la Neige, Grenoble, France

3 CSIRO Environment, Aspendale, Victoria, Australia

4 Australian Antarctic Program Partnership, Institute for Marine and Antarctic Studies, University of Tasmania, Hobart, Tasmania

5 Department of Earth Sciences, University of Cambridge, Cambridge, CB2 3EQ, UK

6 Division of Hydrologic Sciences, Desert Research Institute, Reno, NV 89512, USA

7 College of Earth, Ocean, and Atmospheric Sciences, Oregon State University, Corvallis, OR 97331, USA

8 Centre for Ice and Climate, Niels Bohr Institute, University of Copenhagen, Copenhagen, Denmark

9 Centre for Ocean and Atmospheric Sciences, School of Environmental Sciences, University of East Anglia, Norwich, UK

10 MSHE, CNRS, Université Bourgogne Franche-Comté, Besançon, France

11 Chrono-environnement, CNRS, Université Bourgogne Franche-Comté, Besançon, France

12 Alfred Wegener Institut Helmholtz Zentrum für Polar und Meeresforschung, Bremerhaven, Germany

13 Australian Antarctic Division, Kingston, Tasmania, Australia

14 Ecole Polytechnique Fédérale de Lausanne EPFL, CH-1951, Sion, Switzerland

**Correspondence to:** Xavier Faïn (xavier.fain@univ-grenoble-alpes.fr)

## Summary

|    |                                                                        |    |
|----|------------------------------------------------------------------------|----|
|    | 1. Methodology .....                                                   | 2  |
|    | 1.1. Location of drilling and firn air sampling sites.....             | 2  |
| 5  | 1.2. Ice core chronologies.....                                        | 2  |
|    | 1.3. Calibration of CO datasets.....                                   | 3  |
|    | 1.4. Internal precision of CO CFA analyses .....                       | 4  |
|    | 1.5. External precision of CO CFA analyses .....                       | 6  |
|    | 1.6. Absolute calibration of continuous CO datasets: accuracy.....     | 7  |
| 10 | 2. Supporting Data .....                                               | 9  |
|    | 2.1. CSIRO atmospheric [CO] monitoring in Antarctica .....             | 9  |
|    | 2.2. Firn air measurement uncertainty .....                            | 12 |
|    | 2.3. IGE-GIPSA firn inversion .....                                    | 13 |
|    | 2.3.1. Depth-concentration firn [CO] profiles .....                    | 13 |
| 15 | 2.3.2. Constraints from ice core dataset .....                         | 14 |
|    | 2.4. CSIRO firn inversion .....                                        | 16 |
|    | 2.4.1. Depth-concentration firn [CO] profiles .....                    | 20 |
|    | 2.5. Combining IGE-GIPSA and CSIRO firn reconstructions.....           | 20 |
|    | 2.6. The EDML-B40 continuous CO dataset .....                          | 21 |
| 20 | 2.7. Filling a gap in the DC12 dataset with the Solarice archive.....  | 24 |
|    | 2.8. Evaluation of the smoothing effect of firn on ice core data ..... | 25 |
|    | 2.9. Localisation of charcoal records .....                            | 29 |
|    | 3. References.....                                                     | 29 |

## 1. Methodology

### 1.1. Location of drilling and firn air sampling sites

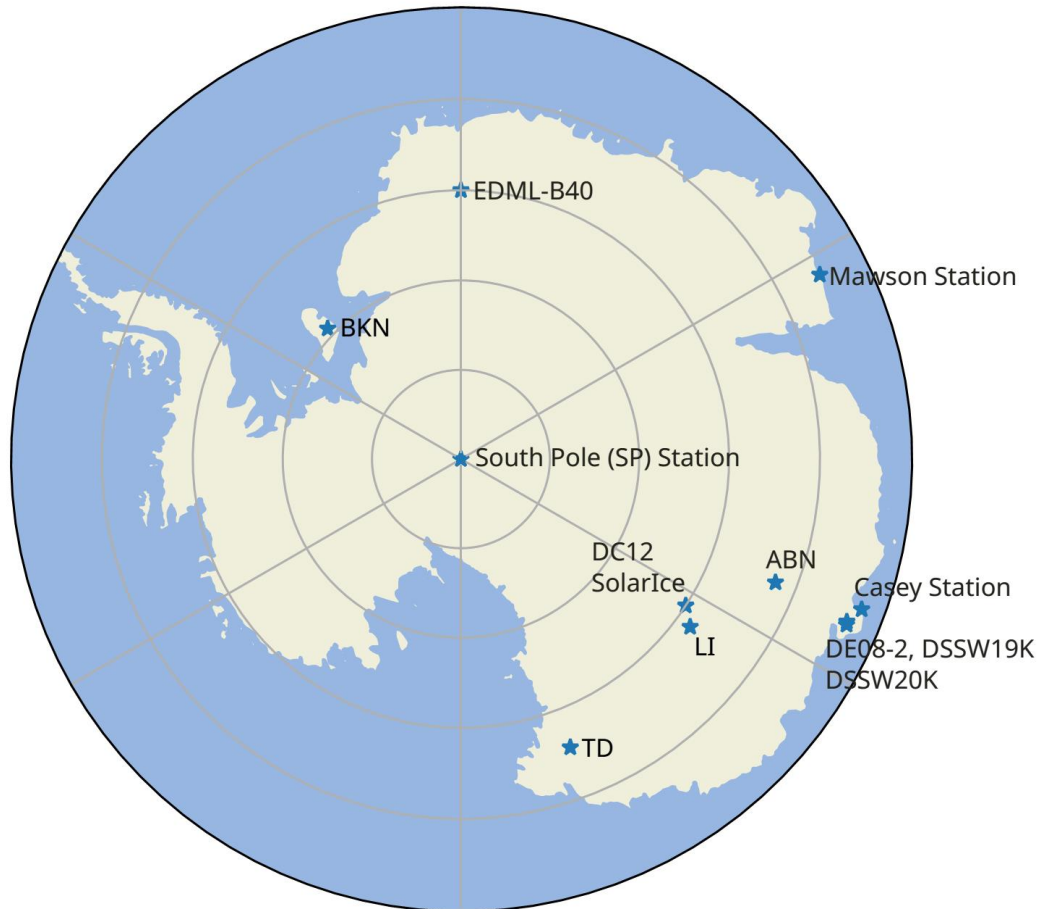

**Figure S1.** Location of the different ice core drillings (DC12, Berkner Island (BKN), and TaldIce (TD)) and firn air sampling (DE08-2, DSSW19K, DSSW20K, Lock In (LI), South Pole (SP), and ABN) sites. The CSIRO stations conducting atmospheric monitoring and discussed in this study are also reported (Mawson, Casey, and South Pole).

### 1.2. Ice core chronologies

All gas age scales reported in this study (i.e., DC12, ABN, TD, and EDML-B40) are tied to the WDC06A-7 chronology.

| Ice core  | $\Delta$ age (yrs) | Reference              |
|-----------|--------------------|------------------------|
| DC12      | 2400               | Fourteau et al., 2020  |
| ABN       | 630                | Servettaz et al., 2022 |
| TalIdIce  | 615                | <i>This study</i>      |
| EDML- B40 | 811                | Rhodes et al., 2016    |

**Table S1.** Gas chronology for ice cores featured in this study.  $\Delta$ age reports the difference between gas age and ice age. All gas age scales are tied to the WDC06A-7 chronology.

### 1.3. Calibration of CO datasets

NOAA and CSIRO have maintained CO measurement programs and separate calibration scales over more than three decades. NOAA is the WMO-designated Central Calibration Laboratory for CO with their data currently reported on the WMO-X2014 scale. Long-term intercomparison programs involving NOAA and CSIRO revealed large concentration-dependent differences in the 1990s (Masarie et al., 2001). Thus CSIRO elected to maintain its own calibration scale. The current version of the CSIRO scale (CSIRO2020) is closely aligned with WMO-X2014 in terms of absolute concentration but its internal consistency and long-term stability are constrained by internal CSIRO procedures and remain entirely independent of WMO-X2014 assignments. Ongoing refinement of calibration scales at both laboratories has led to much improved agreement between the respective scales, with differences now within  $\pm 1$  ppbv over the range of 28 - 487 ppbv (Langenfelds et al., 2023).

CO measurements (including firn and ice cores) are conducted with a SARA optical analyzer (OF-CEAS, Morville et al., 2005) at IGE. CSIRO uses gas chromatography for determination of [CO] in firn air samples (Langenfelds et al., 2023). Such methodologies differ from NOAA, which applies a VURF detection ([https://www.esrl.noaa.gov/gmd/cc1/co\\_scale.html](https://www.esrl.noaa.gov/gmd/cc1/co_scale.html)) for CO mixing ratios. All firn air CO datasets included in this study except Berkner Island (BKN) and Lock-In (LI) datasets were analyzed at CSIRO and are reported on the CSIRO2020 scale. Ice core datasets (analyzed at IGE and DRI) and the LI firn air dataset (analyzed at IGE) are reported on the WMO-X2014 scale. [CO] drifts within cylinders were quantified, either at CSIRO or at IGE. Specifically, the standard gases used for calibrating dataset at IGE were first certified at NOAA in 2012, and recertified in 2020 by the EU ICOS network (<https://www.icos-cp.eu/>). Very limited drifts in [CO] were observed, ranging 0.1 - 0.2 ppbv depending on cylinders. The standard gas cylinders used to calibrate the ABN ice core dataset were certified at NOAA just prior to the CFA campaign.

In this study, we combine CO data produced in different laboratories, principally CSIRO (Australia) and IGE (France). The good agreement between CSIRO2020 and WMO-X2014 (Langenfelds et al., 2023) allows for the combination of datasets reported on either scale to produce a coherent paleo-atmospheric CO history.

For each analytical campaign at IGE (including CFA campaigns and Lock-In firn air sample measurements), the OF-CEAS spectrometer was carefully calibrated on dry gas by direct injection of a synthetic standard gas (Scott Marin, artificial gas mixtures). Finally, during each analytical campaign (CFA and firn air measurements), routine measurements of a gas standard verified that no drift was occurring, and that the calibration of the OF-CEAS analyser was remaining stable.

#### 1.4. Internal precision of CO CFA analyses

Allan-Werle variance tests (Allan, 1966, Werle et al., 1993) applied to calibration loop dataset (deionized degassed water mixed with a single standard gas) in order to evaluate Internal precision and stability of gas-CFA measurements are reported on Fig. S2. Internal precision, defined as twice the Allan-Werle deviation at chosen integration time, was 0.7 and 1.0 ppbv for the IGE (i.e., DC12 and TD) and DRI (i.e., ABN) analytical campaigns (Table S2).

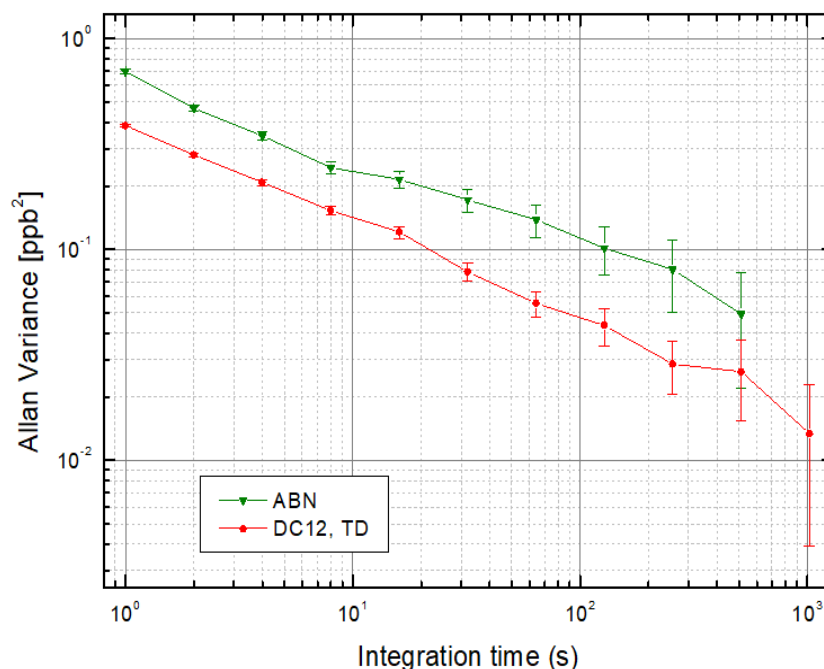

**Figure S2.** Allan-Werle variance results for calibration loop dataset (DI degassed water mixed with a single standard gas) collected for the different CFA setups: DRI (ABN core) and IGE (DC12 and TD cores).

| Ice core | Laboratory of analysis | Analysis date | Mean gas sample flow (sccm min <sup>-1</sup> ) | Optimal Integration Time (s) | Integration Time applied (s) | Internal precision at IT (ppbv) (2σ) | External precision (ppbv) (2σ) | System response time (min) | CO blank (ppbv) | CO solubility losses (%) |
|----------|------------------------|---------------|------------------------------------------------|------------------------------|------------------------------|--------------------------------------|--------------------------------|----------------------------|-----------------|--------------------------|
| EDML-B40 | DRI                    | 10-14/10/2013 | 1.50                                           | n.d.                         | 10                           | n.d.                                 | n.d.                           | 14.2                       | n.d.            | 6.0%                     |
| DC12     | IGE                    | 6-24/06/2014  | 1.35                                           | >1000                        | 10                           | 0.7                                  | 2.8                            | 1.6                        | 4.1             | 7.4%                     |
| TD       | IGE                    | 17-21/10/2014 | 1.45                                           | >1000                        | 10                           | 0.7                                  | 2.8                            | 1.6                        | 4.1             | 7.4%                     |
| ABN      | DRI                    | 5-14/10/2015  | 1.62                                           | >500                         | 10                           | 1.0                                  | 8.8                            | 9.3                        | 7.4             | 6.0%                     |
| Solarice | IGE                    | 15/01/2019    | 1.30                                           | >1000                        | 10                           | 0.7                                  | 8.8                            | 1.6                        | 4.1             | 7.4%                     |

**Table S2.** CFA setup specifications and performances of the different analytical campaigns.

## 1.5. External precision of CO CFA analyses

External precision of the continuous CO measurements (i.e., including all sources of errors or bias) can be investigated by melting replicate ice sticks on different days on a gas-CFA setup. Such an approach has been applied before to CFA gas setups (Faïn et al., 2022). Specifically, we define the external precision as the pooled standard deviations calculated on the differences of CO concentrations from main and replicate analysed ice sticks, averaging continuous CO data over few cm long intervals.

No long sections (i.e., > 1 meters) of replicate ice sticks were available or analysed in the frame of this study to evaluate external precision directly on Antarctica ice samples. External precision for the IGE and DRI continuous CO measurements are thus extracted from the comparison of main and replicate analyses conducted on the PLACE core, although this archive exhibits higher [CO] compared to Antarctic ice. The PLACE core was drilled in 2015 nearby Summit Station, Central Greenland, and analysed in 2015 and 2017 at DRI and IGE, respectively (Faïn et al., 2022).

[CO] patterns extracted from the PLACE core exhibit high frequency variability, with high amplitude spike (i.e., amplitude larger than 100 ppbv is observed, Faïn et al., 2022). Such patterns are different from continuous [CO] extracted from Antarctica ice, which reveals no in-situ production and no high-frequency, non-atmospheric, features (Fig. 2). Specifically, the difference between the maxima and minima of [CO] observed in our Antarctic high resolution CFA records is ~15 ppbv (Fig. 2). Therefore, only sections of the PLACE record exhibiting minimum [CO] but within a range of 15 ppbv were considered for the evaluation of external precisions for Antarctica samples.

In practice, 14.2 m (resp., 1.9 m) of replicate PLACE sticks analysed at DRI in 2015 (resp., at IGE in 2017) were first considered. CO concentrations measured on both main and replicate ice sticks were averaged by binning over 142 10-cm long (resp., over 190 1-cm long) intervals at DRI (resp., at IGE). Second, 33 (resp., 33) intervals were selected at DRI (resp., IGE) for exhibiting minimum [CO] of the Greenland records, and within a range of 15 ppbv. Figure S3 reports significant correlations between averaged [CO] from main cuts versus averaged [CO] from replicate cuts for

both CFA setups. Finally,  $2\sigma$  external precision of 4.0 ppbv (resp. 8.8 ppbv) was calculated for the IGE CFA setup (resp., the DRI CFA setup).

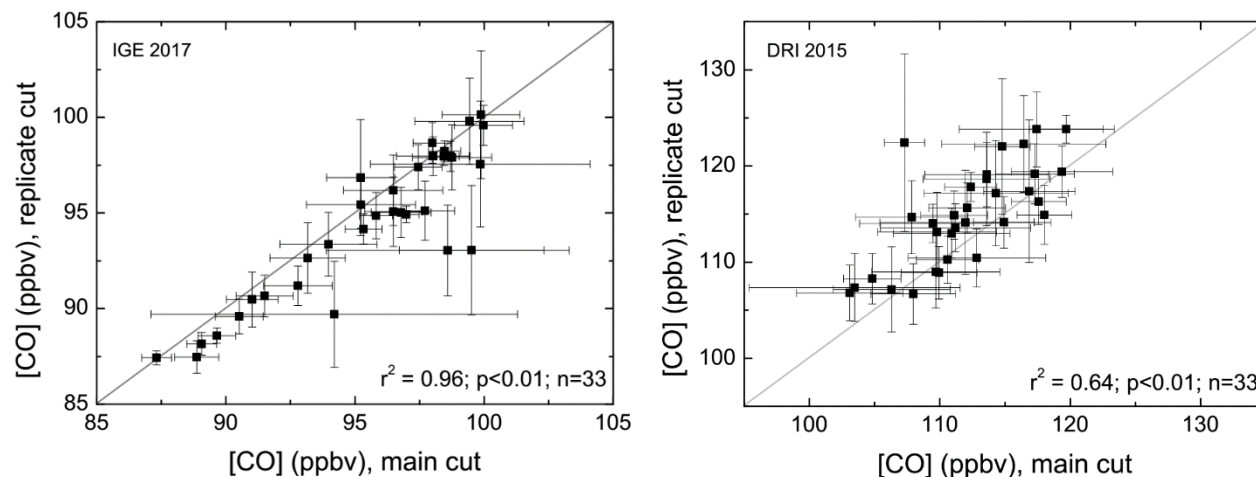

**Figure S3.** CO mixing ratios measured on both main and replicate PLACE ice sticks at IGE (left panel) and DRI (right panel), after averaging data over 1-cm long (resp., over 10-cm long) intervals at IGE (resp., at DRI). The 1:1 line is shown in grey.

## 1.6. Absolute calibration of continuous CO datasets: accuracy

A fraction, or all, of gases dissolved in the water CFA sample flow are not recovered by the Idex degassers used in this study. CO solubility is higher than  $N_2$  or  $O_2$  solubility. This preferential dissolution of CO in comparison to  $N_2$  and  $O_2$  results in underestimated CO mixing ratios when detected at the gas outlet of the degasser. This underestimation of CO mixing ratios need to be accurately quantified so as to provide an absolute calibration of CO continuous dataset.

In this study, we follow the rationale reported by Faïn et al. (2022) and use the calibration loop (CL) to calibrate internally (i.e., with CFA data) continuous CO datasets. We hypothesise that CO and methane dissolution follow the same physical laws: consequently, if a calibration loop is able to reproduce methane preferential dissolution, it should also reproduce CO losses related to dissolution. Estimates of methane losses related to dissolution, independent of the calibration loop, from each ice core analyzed, was thus required. For the ice core DC12, preferential methane dissolution was already known (Fourteau et al., 2020). For the ABN and TD archives, it was evaluated by direct comparison of CFA dataset with WAIS-Divide discrete record (Mitchell et al., 2013). Finally, we observed an underestimation of methane mixing ratios of 11.1%, 9.5%, and 11.1% when measuring the DC12, ABN, and TD cores, respectively.

140 Each continuous CO dataset, after initial calibration of the OF-CEAS analyser (Sect. 1.2), was calibrated according to the following:  $[CO]_{COR} = ([CO]_{SAMPLE} - CO_{BLANK}) / SC$

With SC the Solubility Correction evaluated with CL experiment, and  $CO_{BLANK}$ , the CO blank of the CFA setup.

SC was extracted from multi-standards (with  $[CO]$  ranging 30-100 ppbv) CL experiments. We  
145 operated the CL with different artificial gas cylinders of known CO and CH<sub>4</sub> mixing ratios. Liquid and gas flows injected through the CL were chosen to reproduce ice air content value. Gas flow was later adjusted if required so as the calibration loop reproduces nicely the expected methane preferential dissolution. At IGE, we were also able to add to the CL experiment an injection of CO-depleted air (so called “Air Zero” later), produced by flushing room air on PtO trap heated at  
150 200°C. After and/or before each calibration loop experiment, gas from all cylinders and Air Zero were analysed directly with the OF-CEAS analyser. The CL data were not calibrated onto the WMO-X2014 scale, but instead directly compared to these direct measurements from cylinders or Air Zero. The same calibration was applied to both datasets collected with the IGE setup, i.e. DC12 and TD (Fig. S4). Indeed (i) similar CH<sub>4</sub> preferential dissolutions were observed during the  
155 DC12 and TD analyses, and (ii) configuration of IGE CFA setup remains identical for the DC12 and TD analytical campaigns. Similarly, the calibration applied to the ABN dataset is identical to the one previously used by Faïn et al., (2022) to calibrate the PLACE dataset. The ABN core was analysed immediately after the PLACE core, with no changes within the CFA setup, and similar CH<sub>4</sub> preferential dissolution was observed during the PLACE and ABN analyses. The CO blanks  
160 of the IGE and DRI setups have been reported previously (Faïn et al., 2022) and are reported in Table S2, along with SC.

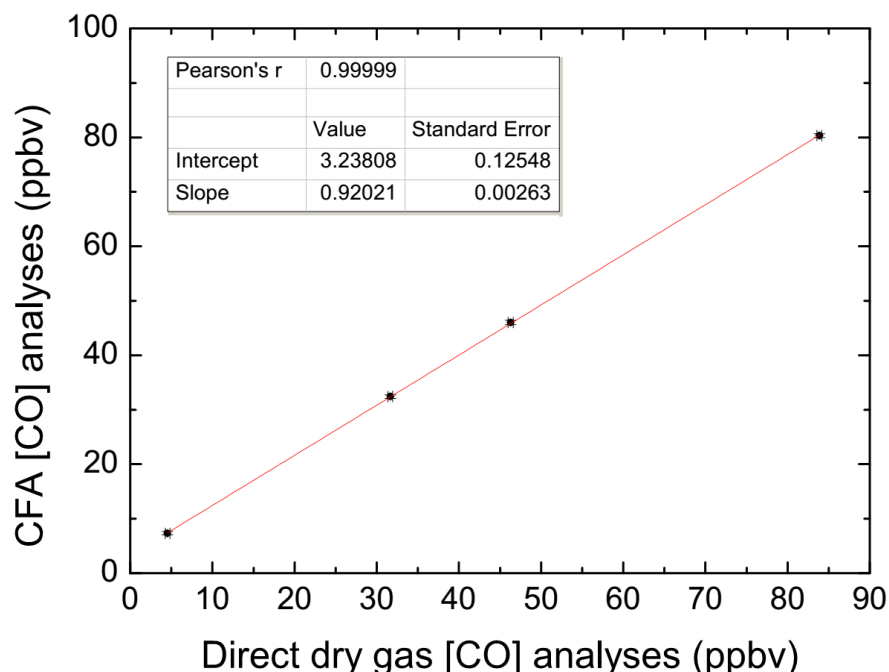

**Figure S4.** Multi-standard Calibration Loop experiment conducted on the IGE CFA setup: CO preferential dissolution representative of the DC12 and TD melting conditions. The intercept indicates the CO blank level during the experiment, and is in agreement with the CO system blank established previously for the IGE CFA setup (i.e.,  $4.1 \pm 1.2$  ppbv, Table S2; Faïn et al., 2022).

## 2. Supporting Data

### 2.1. CSIRO atmospheric [CO] monitoring in Antarctica

CSIRO has measured CO in flask samples of background air from a range of SH sites since the 1980s. Antarctic sites with long CO records include Mawson (MAA, since 1984), South Pole (SPO, since 1991) and Casey (CYA, since 1996). Samples were pressurized in CSIRO's 0.5L or 5.0L glass flasks using customised pump units equipped with either chemical (anhydrous magnesium perchlorate) or cryogenic drying (Francey et al., 2003; Langenfelds et al., 2023). The MAA dataset is used as the primary link to firn/ice data in this study due to its longer duration and MAA's coastal Antarctic location being similar to that of Law Dome.

Gas chromatographic (GC) measurements since 1991 were made using a Trace Analytical Reduction Gas Analyser (RGA). These records are supported by extensive measurements of a large suite of calibration standards, including ten CO-in-synthetic-air standards in the range of

180 approximately 23 - 200 ppbv that were prepared by Scott Marrin, USA in 1992 and which retain about 1/3 of their original contents. Random uncertainties applying to these flask sample CO data are generally within  $\pm 1$  ppbv. Systematic uncertainties relevant to comparison with firn/ice data are dominated by two components:

185 (i) Correction for flask storage effects. Measured CO in CSIRO's 0.5L glass flasks with PFA o-rings is corrected by  $-0.0058$  ppbv/day of storage (equivalent to  $-2.1$  ppbv  $\text{yr}^{-1}$ ), as derived from multiple, mainly laboratory-based storage tests. However, drift rates can vary depending on flask history, condition and CO content of the atmosphere in which the flasks are stored. Because MAA samples are returned to CSIRO in annual batches, mean corrections are approximately  $-1.4$  ppbv with an estimated uncertainty of  $\pm 1$  ppbv in MAA annual means.

190 (ii) Long-term calibration drift. Uncertainty in stability of the CSIRO2020 scale over three decades is estimated at  $\pm 0.1$  ppbv  $\text{yr}^{-1}$ , based on the measured relative stability of a large number of air samples/standards stored in a range of different cylinder types, and supporting results from other experimental tests of instrument and air standard stability (Masarie et al., 2001).

195 GC measurements of earlier MAA samples (1984 - 1990) were made with one of two Carle instruments where CO was catalytically converted to  $\text{CH}_4$  for flame ionisation detection (FID). Data from this period are not supported by similar levels of calibration and other diagnostic data as applied to the RGA data (Langenfelds et al., 2023). These early data are noisier and carry larger uncertainty in scale stability of  $\pm 0.57\%$   $\text{yr}^{-1}$  (equivalent to approx.  $\pm 0.24$  ppbv  $\text{yr}^{-1}$  in CO mole fraction observed at that time; Langenfelds et al., 2023). Consequently, they are not used  
200 in this study.

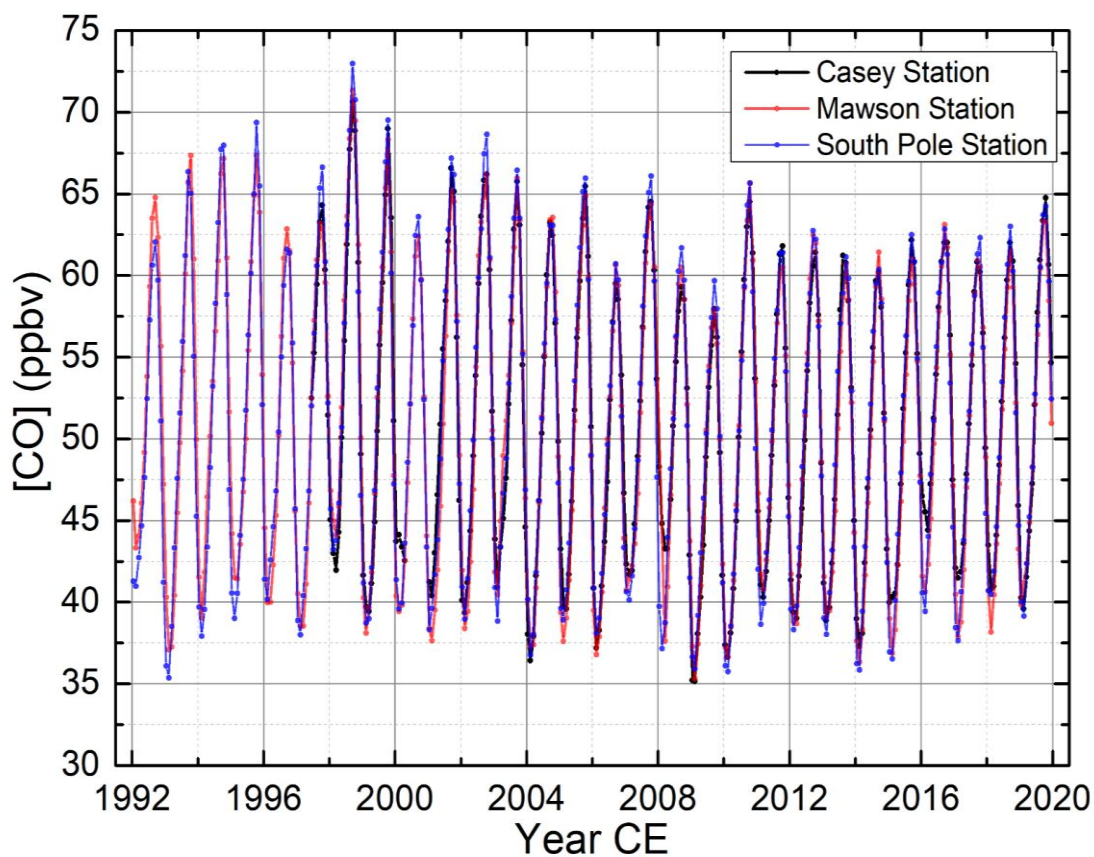

**Figure S5.** Monthly mean records from flask measurements of [CO] by CSIRO at Casey (Loh et al., 2021a), South Pole (Loh et al., 2021b), and Mawson (Loh et al., 2021c) stations (Antarctica), for the time period spanning 1992-2020 CE. Data are reported on the CSIRO2020 CO scale.

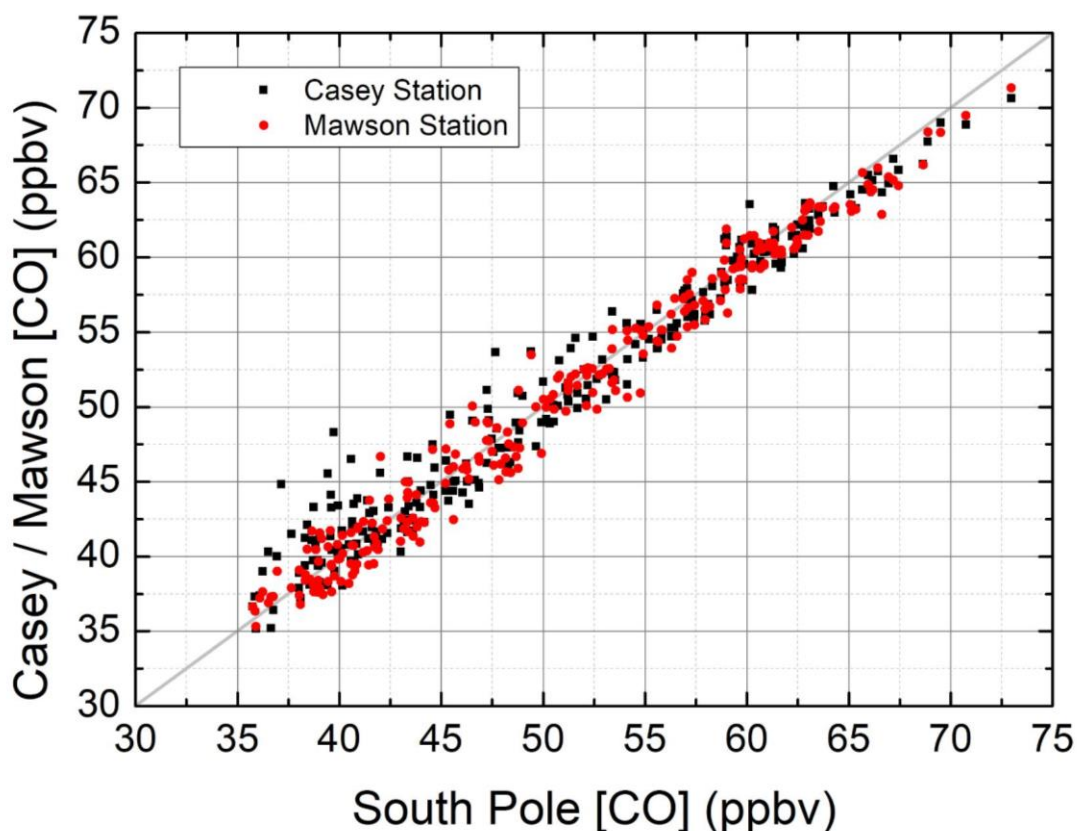

**Figure S6.** Correlation ( $r^2 = 0.96$ ) of the CSIRO monthly mean records from flask measurements of [CO] from Casey (Loh et al., 2021a), South Pole (Loh et al., 2021b), and Mawson (Loh et al., 2021c) stations, for the period spanning 1997-2020 CE. Data are reported on the CSIRO2020 CO scale. The grey line indicates the 1:1 line.

## 2.2 Firn air measurement uncertainty

The precision of the firn air [CO] measurements can be estimated from replicate measurements of samples collected at the same level for each site. The 2-sigma precision is about 1 ppbv for all sites, except for DE08-2 where it is about 2 ppbv. The accuracy, including possible effects of the firn air sampling device (FASD) tubing, bladder and pumps, sample storage in the flask and subsequent measurement, is more difficult to estimate. Comparisons of “surface” firn air [CO], where the FASD inlet is at the snow surface, with “reference” atmospheric [CO] concentrations from air sampled into flasks directly at the site, or with the CO measurements at the coastal stations, mainly Mawson (both firn measurements and station measurements being on the same scale) may reveal sampling artifacts. This assumes that the “reference” measurements are accurate and are representative of the air being sampled at the firn air sampling location and time by the FASD. The comparison is also limited by the sample size- typically only a few surface firn

air sample measurements are made. Also, the deepest levels, where the firn air sample flow can be very low and pumped at well below ambient pressures, can be challenging to sample reliably, and may not be closely simulated by the FASD at the surface (sampling at ABN simulated sub ambient pressure in the inlet line by placing a restriction on the FASD inlet, with no detectable systematic effect on [CO]). The comparison of surface firn [CO] with reference atmospheric [CO] gives differences of about  $\pm 1$  ppbv.

## 2.3. IGE-GIPSA firn inversion

### 2.3.1. Depth-concentration firn [CO] profiles

As mentioned in the caption of Fig. 1 in the main manuscript, comparing the [CO] firn data plotted as a function of mean age with the modeled atmospheric trend is not entirely rigorous due to the distributed gas ages resulting from diffusive mixing in the firn. Here we more appropriately compare the [CO] observed and modelled in the firn air. To model [CO] we used the atmospheric trend obtained by inverse firn modeling as input to the forward firn model. The best guess results and uncertainty envelopes illustrate the ability of the model to simultaneously represent the five datasets (Fig. S7).

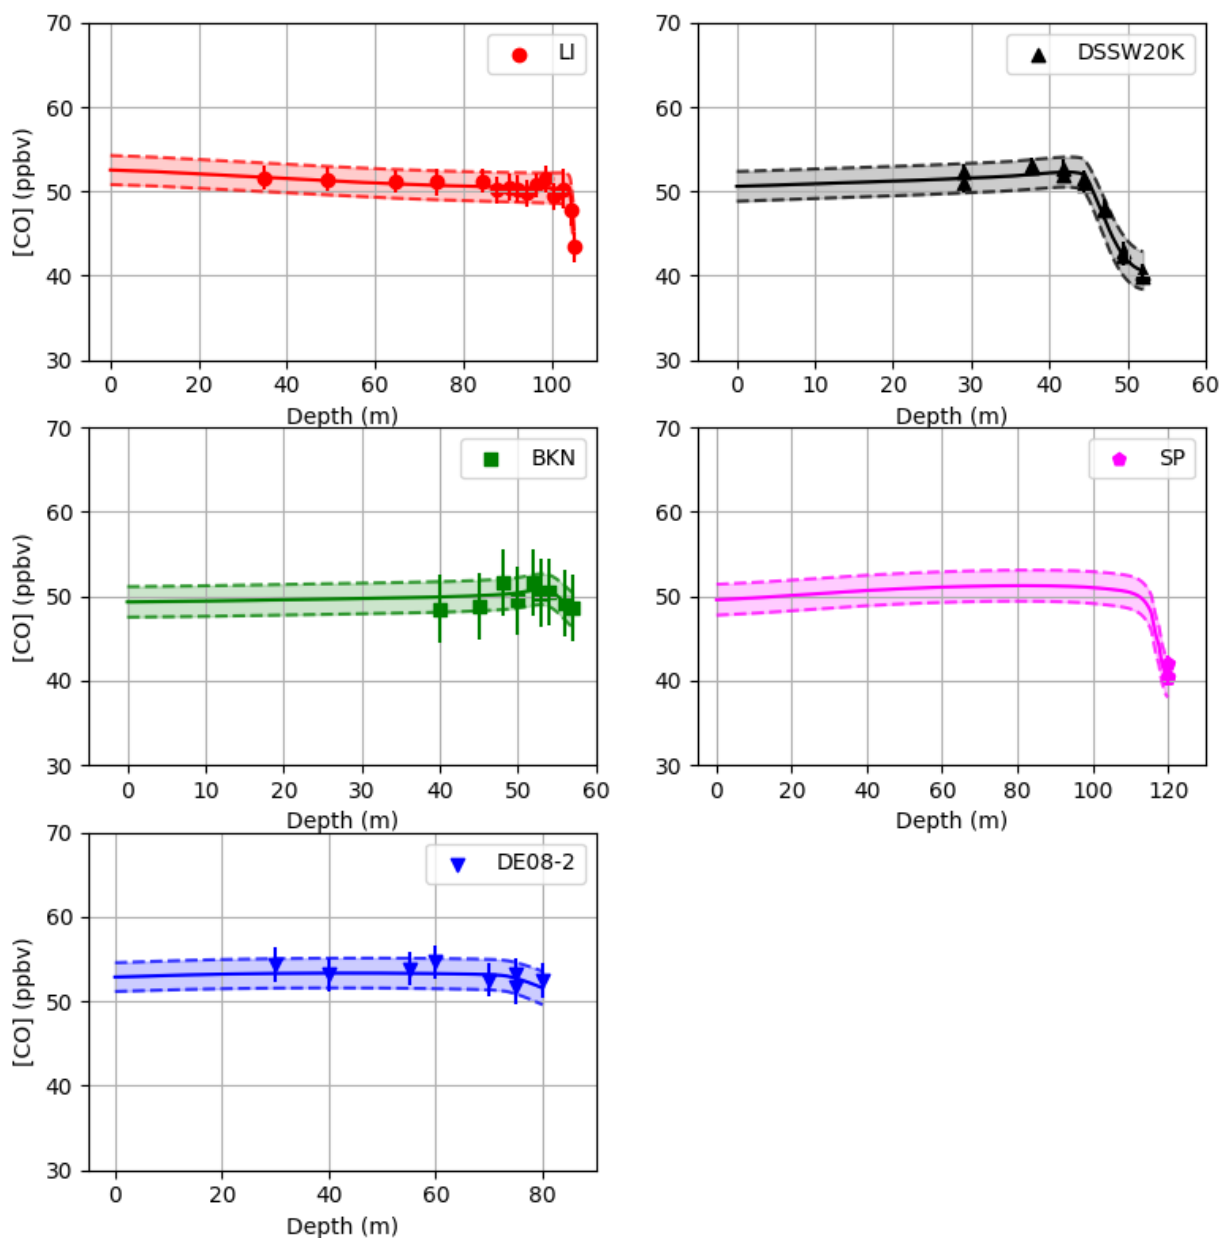

**Figure S7.** Concentration-depth profiles in the firn air at the five sites investigated with the IGE-GIPSA model. The measurements are reported with symbols with error bars indicating  $2\sigma$  uncertainties (when available). The solid lines are best fits of the firn IGE-GIPSA model, with envelopes indicating the  $2\sigma$  uncertainties.

### 2.3.2. Constraints from ice core dataset

As introduced in Sect. 2.4 of the main manuscript, simulations were performed with the IGE-GIPSA model with and without constraints from ice core data in addition to firn air data. The two

tests are compared in Fig. S8. The multi-site record based on a spline-fit to the ice core data presented in Section 3.3.2 is used to build five synthetic data points in BKN ice at 70, 71, 72, 73 and 74 meters depth. BKN is used as a substitute for the ABN site, which has almost the same accumulation rate. The Green's function approach was used to calculate mean gas ages at the selected depth levels in BKN ice, then CO mixing ratios at the same gas-age in the multi-site spline-fit, ranging between 1862 and 1889 CE, were used to build the five synthetic data points shown on the lower left side of Fig. S8. The time trend scenarios obtained with (in black) and without (in grey) constraints in ice remain within the uncertainty envelopes of one another on their common time frame. Using the ice constraint allows us to reconstruct a trend that goes further back in time.

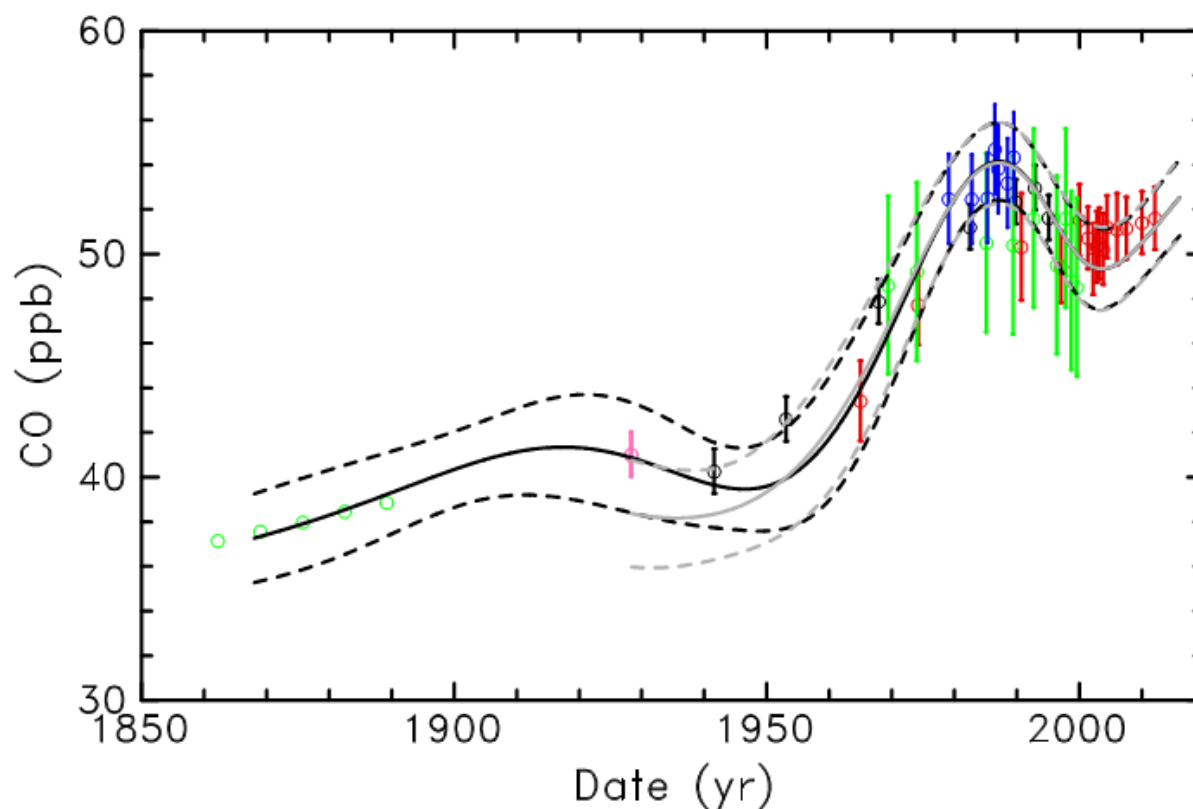

**Figure S8.** Modelled time trends of CO mixing ratios (continuous lines) with uncertainty envelopes ( $2\sigma$ , dashed lines) obtained with (in black) and without (in grey) synthetic ice core constraint. Synthetic ice core data are shown as green open circles on the left side of the plot (before 1900 CE) whereas firn air data are shown as open circles with uncertainties plotted as vertical bars, LI in red, DSSW20K in black, BKN in green, SP in pink, and DE08-2 in blue. We should note that firn air data plotted versus mean age are not strictly comparable to the modelled time trends which are determined using the age distributions for the

samples from the firn model. This effect is most important near maxima or minima of the trend that are smoothed in the data.

## 2.4. CSIRO firn inversion

270 The results from the CSIRO inverse model described in the main paper are obtained by using the  
CO ice reconstruction up to 1897 and the Mawson atmospheric record from 1993, and inferring  
the atmospheric history between 1898 and 1992 from the firn measurements. Here we give more  
details about that calculation, and show results from alternative calculations that do not use the  
ice reconstruction or the Mawson record. The CSIRO inverse model is implemented in IDL (Exelis  
275 Visual Information Solutions, Boulder, Colorado) using the `constrained_min` routine. Non-  
negativity constraints such as those used by Trudinger et al. (2016) for PFCs are not useful in our  
inversion for CO because the mole fraction is far from zero and can decrease in time. A simple  
prior estimate of the CO atmospheric history is used as a starting point for the inversion, but is  
not included in the cost function. The results were found not to be sensitive to the prior estimate  
280 (after 1898, see next paragraph).

We include the ice reconstruction (black line in Fig. 3) in the inversion by setting the prior estimate  
to match the ice reconstruction up to 1897 and not allowing the inversion to update these values.  
The Green's functions for the deep firn that extend before 1898 are therefore convolved with a  
history that is part ice reconstruction and part firn reconstruction. We include the Mawson  
285 atmospheric history by using the firn model to calculate the influence at the measurement depths  
of the Mawson record interpolated to daily resolution from mid-1992 and mean seasonality before  
1992, then subtracting this from the firn measurements prior to the inversion. We include the  
Mawson record in this way because the Mawson record needs to be modelled at about daily  
resolution to give accurate variation of CO with depth in the upper firn, and the Green's functions  
290 (saved at annual resolution) could not do this. Figure S9 shows the contribution of the different  
parts of the atmospheric history (i.e., up to 1897, between 1898 and 1992 and after 1993) to the  
modelled firn depth profiles.

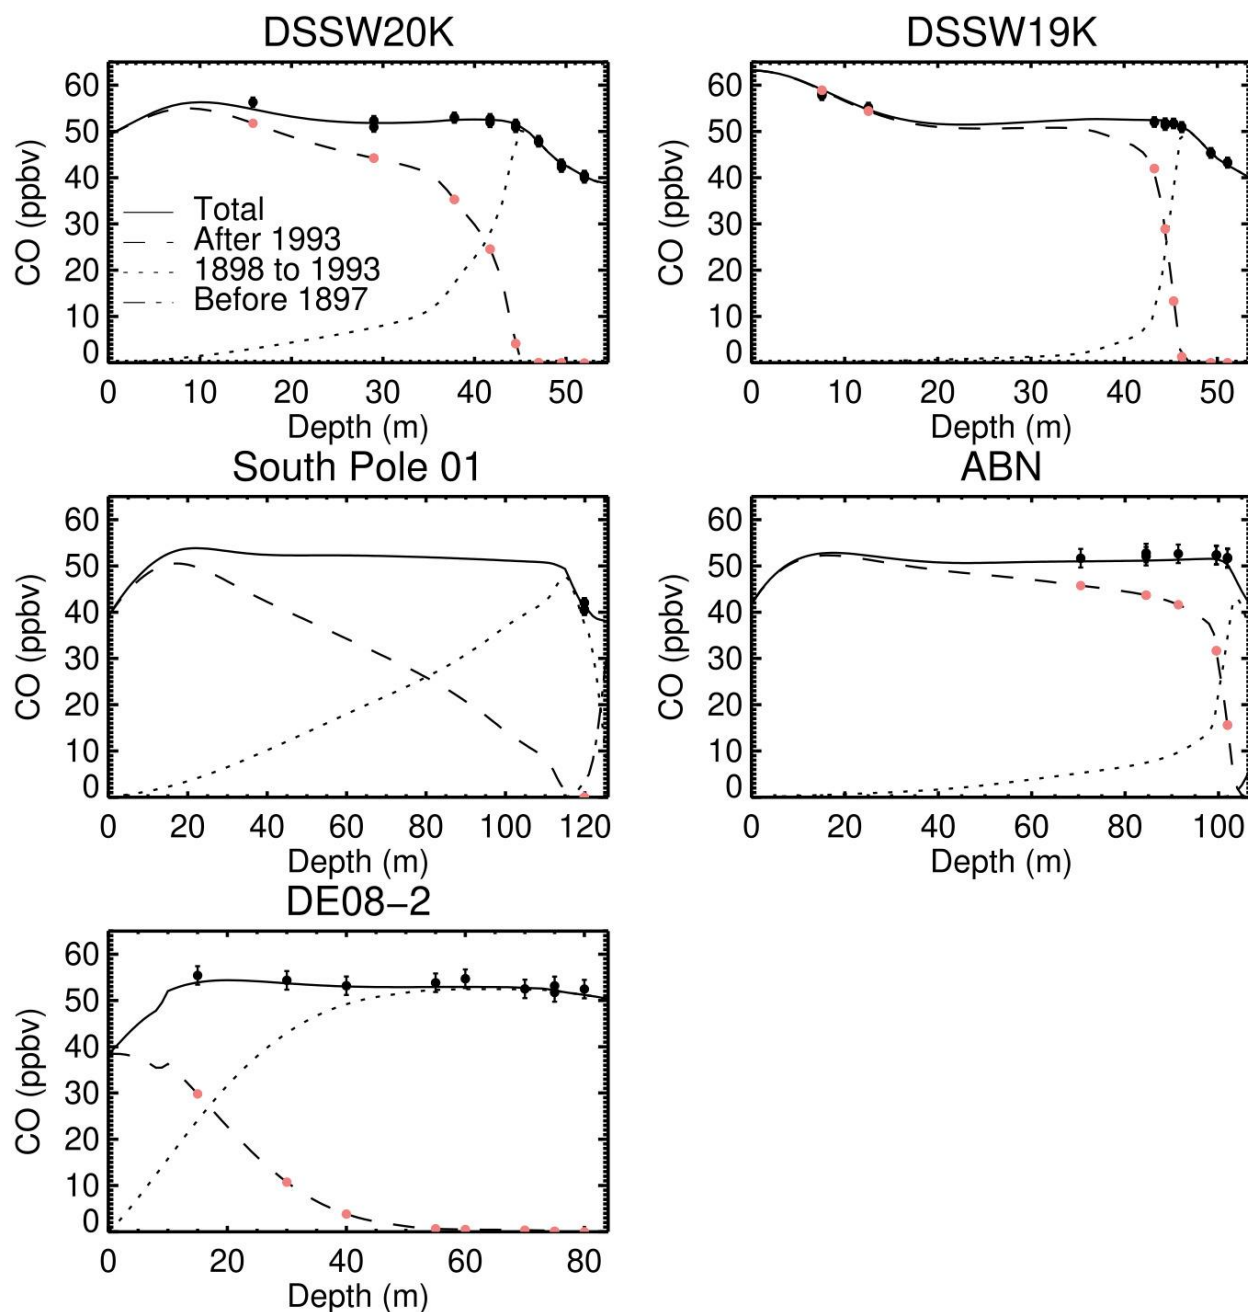

295 **Figure S9.** Modelled depth profiles of [CO] inversions from the CSIRO firn model at five sites (DSSW20K, DSSW19K, South Pole 01 (SP), ABN and DE08-2) showing the contribution of the atmospheric history up to 1897 (from the ice reconstruction), between 1898 and 1992 (inferred from the firn measurements) and after 1993 (from the Mawson atmospheric record). The black symbols show the actual firn measurements, and the pink symbols show the modelled influence of the Mawson record at the measurements depths.

300

The CSIRO inverse model uses bootstrapping to estimate uncertainties in the atmospheric CO reconstruction due to uncertainties in the firn measurements, the firn model, the ice reconstruction and the Mawson record. That is, we repeat the inversion more than 1000 times with the firn observations perturbed according to their uncertainty, using different firn model Green's functions from an ensemble generated during firn model calibration (Trudinger et al., 2013), and ice reconstruction and Mawson record realisations that have been perturbed according to their respective uncertainties. The ice reconstruction is taken to have random uncertainties of 3.7 ppbv before 1880 and 8.8 ppbv after 1880 (see Sections 2.6.2 and S1.5, these are  $2\sigma$  estimates of external precision from replicate ice sticks, modelled in the CSIRO inversion as random perturbations to annual values of the ice reconstruction) and systematic uncertainties due to the blank (2.8 ppbv) and solubility (0.4 ppbv), both  $2\sigma$ , each modelled as a separate perturbation that is constant for each realisation of the ice reconstruction in the inversion). In general, realisations of the ice reconstruction that are higher (on average) lead to firn reconstruction solutions that are lower, and vice versa, so that the convolution with the Green's function provides a similar match to the firn observations. The Mawson record uncertainties are dominated by systematic uncertainty due to the correction for flask storage effects (the same uncertainty for all years) and long-term calibration drift (higher uncertainty in early years, decreasing linearly with time) - see Sect. 2.1 and Langenfelds et al., (2023). These uncertainties are modelled in the CSIRO inversion by including random perturbations in the influence of the Mawson records at the firn measurement depths that are subtracted from the firn measurements before the inverse calculation. The maximum size of the perturbations has been determined with the firn model based on worst-case scenarios (specified at daily resolution) for errors in the Mawson record; the flask storage effect varies seasonally but averages about 1.4 ppbv over a year, and the calibration drift is 3 ppbv in 1992 decreasing linearly to zero now (these are taken to be  $3\sigma$ ).

We also consider a case without the ice reconstruction. In this case, the inversion infers the CO history back to 1900 and assumes constant CO levels up to 1900. No information about the ice reconstruction is used in this case. The inferred history differs by up to about 1 ppbv from the case that uses the ice reconstruction, well within the uncertainty range. In addition, we consider a case without the Mawson record, and instead infer the atmospheric history up to 2004 from firn measurements below 25m (to avoid the influence of the seasonal cycle). These results are shown in Fig. S10, with all solutions showing good consistency.

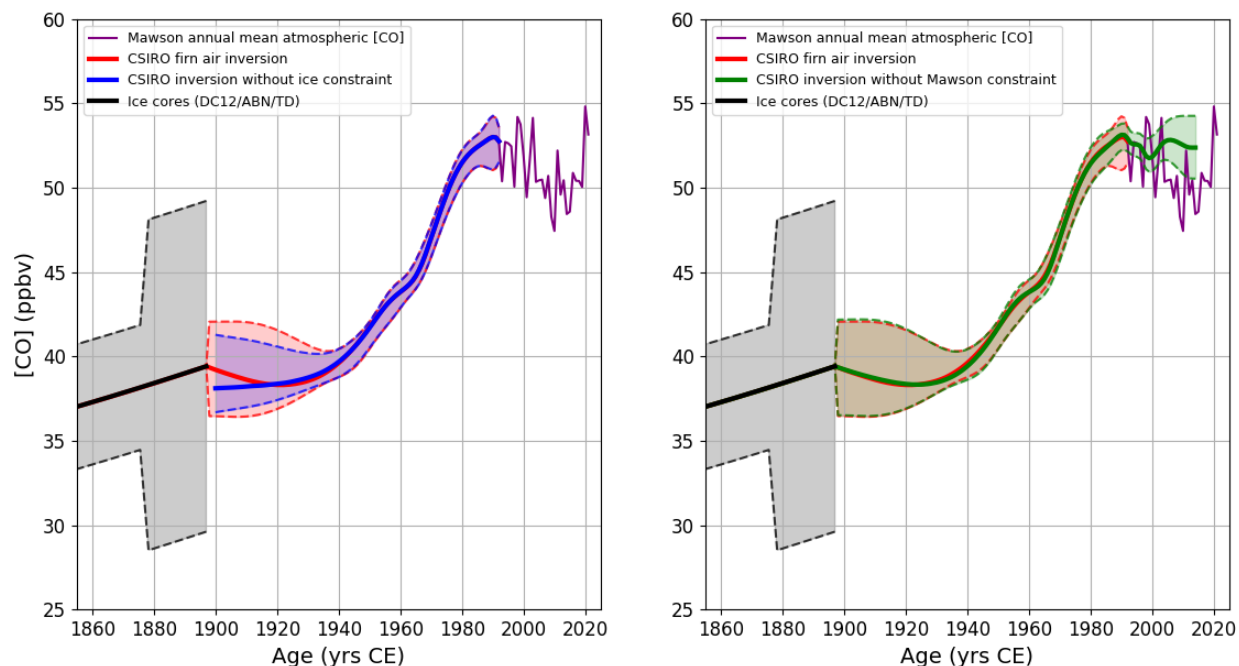

**Figure S10.** [CO] atmospheric reconstruction from the CSIRO inverse model with ice constraint (red line), and without ice constraint (blue line). The difference between the two inversions in 1897 CE is 1 ppbv. The grey envelope shows the ice core record.

### 2.4.1. Depth-concentration firn [CO] profiles

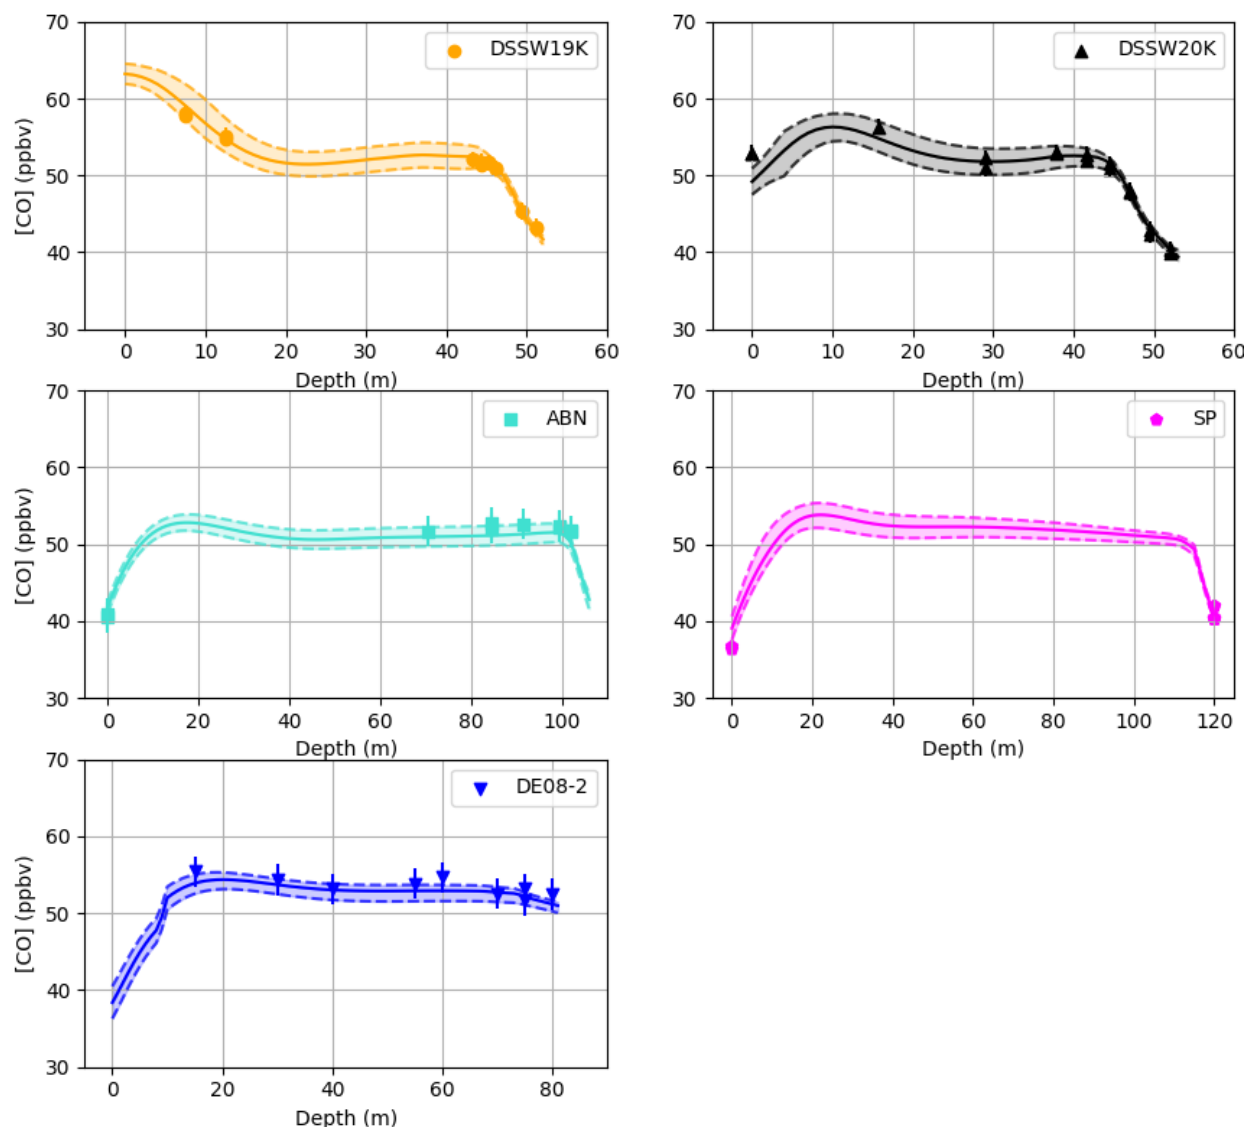

**Figure S11.** Concentration-depth profiles in the firn air at the five sites investigated with the CSIRO model.

The measurements are reported with symbols with error bars indicating  $2\sigma$  uncertainties. The solid lines are best fits of the firn CSIRO model, with envelopes indicating the  $2\sigma$  uncertainties.

### 2.5. Combining IGE-GIPSA and CSIRO firn reconstructions

In this study, we use two independent models as a way to incorporate firn model uncertainty. Over the period spanning 1905 to 1992, we average the IGE-GIPSA and CSIRO records' annual values to produce a multimodel firn air CO reconstruction. For the 1897-1904 CE period, a third order polynomial weight was introduced in the annual averaging of the two firn records. Such approach

(Fig. S12) allowed (i) to weight the multimodel record toward the CSIRO reconstruction in 1897 CE (because it is continuous with the ice reconstruction), and (ii) to match the [CO] growth rates (ie. in ppbv/yr) of the firn and ice core reconstructions in 1897 and 1905 CE. The multimodel firn air reconstruction is reported in Fig. S12, along with IGE-GIPSA and CSIRO reconstructions. The envelopes represent  $2\sigma$  uncertainty intervals.

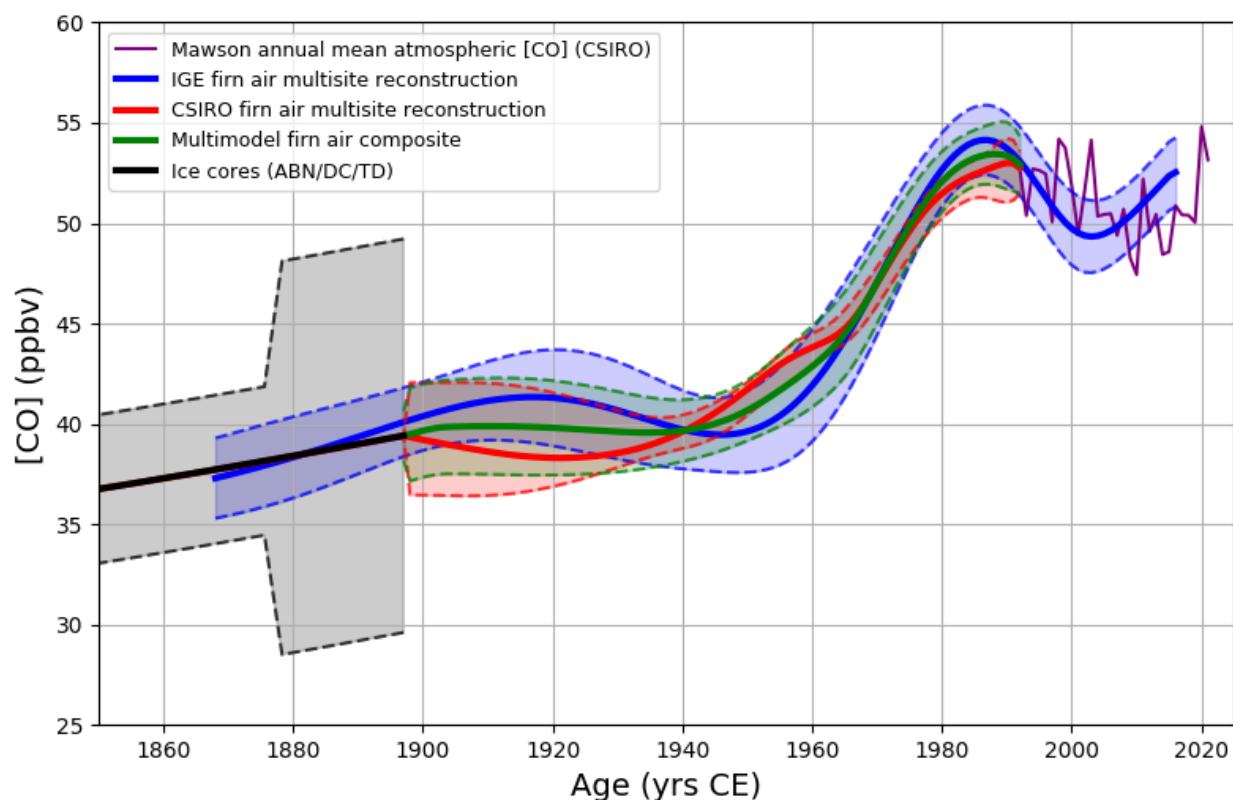

**Figure S12.** Optimal atmospheric [CO] history obtained with IGE-GIPSA (blue line) and CSIRO (red line) models. The green line shows the multimodel record obtained by averaging the IGE-GIPSA and CSIRO records.

## 2.6. The EDML-B40 continuous CO dataset

The EDML-B40 (later referenced as B40 in this section) ice core was drilled close to Kohnen Station, Dronning Maud Land, East Antarctica, by the Alfred Wegener Institute (drilling site : 75.001° S, 0.068° E, 2911 m elevation, Fig. S1 and Table S3). This core was analyzed on the DRI CFA setup in September 2013 with a focus on methane mixing ratio (Rhodes et al., 2016). However, we were able to simultaneously measure CO concentrations, making the B40 core the first Antarctic ice archive measured for CO by CFA. As a first attempt to analyze continuously low-levels [CO] preserved in Antarctica ice, the B40 dataset is affected by memory effects and

unexplained contaminations when initializing melting. Consequently, these data are not robust, and could not be calibrated and reported as absolute values. The configuration of the B40 analyses is reported in Table S2.

| Ice core & location<br>(Fig. S1) | Depth intervals<br>(m) | Gas age interval<br>(yrs CE) | Accum. Rate<br>(cm weq yr <sup>-1</sup> ) | Mean annual<br>Temp. (°C) |
|----------------------------------|------------------------|------------------------------|-------------------------------------------|---------------------------|
| EDML - B40                       | 97.0 - 99.0            | 1849 ; 1878                  | 6.3 <sup>a</sup>                          | -46 <sup>a</sup>          |
| Dronning Maud Land               | 100.3 - 103.9          | 1781 ; 1833                  |                                           |                           |
| 75°S, 0° E                       | 107.2 - 109.9          | 1698 ; 1736                  |                                           |                           |
| 2911 m elevation                 | 115.2 - 116.3          | 1606 ; 1623                  |                                           |                           |
|                                  | 117.6 - 119.7          | 1560 ; 1590                  |                                           |                           |
| Solar-Ice                        | 150.0 - 158.7          | -71 ; 27                     | 2.5 <sup>b</sup>                          | -53 <sup>c</sup>          |
| Dôme Concordia                   |                        |                              |                                           |                           |
| 75°0.6' S, 133°2' E              |                        |                              |                                           |                           |
| 3233 m elevation                 |                        |                              |                                           |                           |

380 **Table S3.** Locations, site characteristics and other relevant information for the EDML-B40 and Solar-Ice ice cores. <sup>a</sup>Klein et al. (2014), <sup>b</sup>Gautier et al. (2016), <sup>c</sup>Fabre et al. (2000).

Figure S13 reports raw CO data from the B40 core, and highlights in red decreasing CO trends systematically observed when initializing melting.

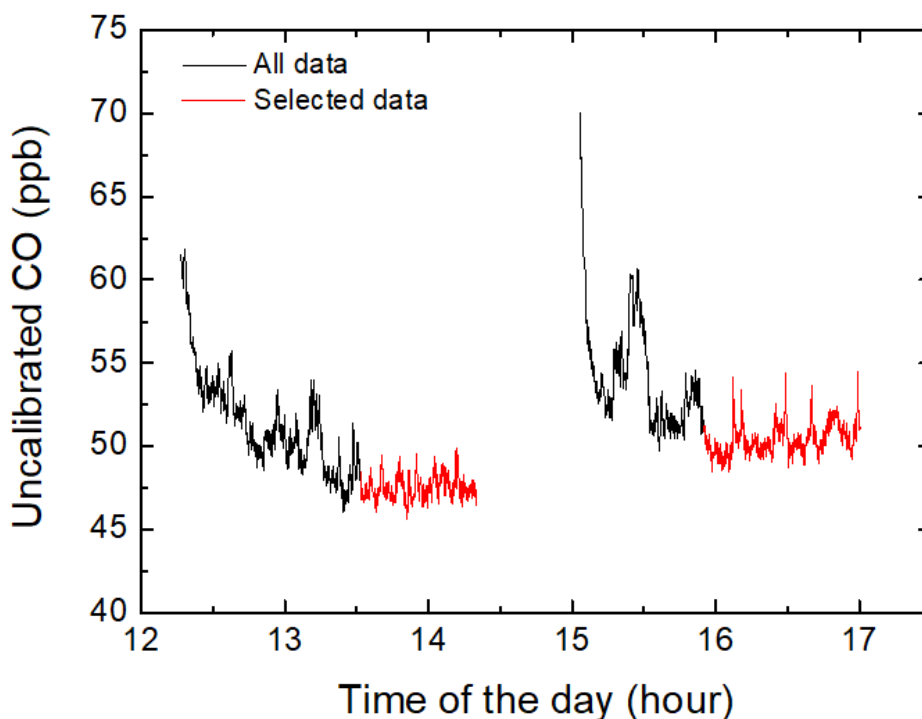

**Figure S13.** Typical EDML-B40 raw continuous CO data collected at DRI in September, 2013. Each analytical run lasts ~2 hours, and no sample is melted between runs. Decreasing trends in CO mixing ratio were observed at the beginning of each run, lasting for about half of the run.

In this Supplement, we extract the fraction of the B40 that we consider not affected by these contamination, i.e., for each melting run lasting about 2 hours, we kept the last hour of measurement (reported in red on Fig. S13). This is a conservative approach, but we preferred not applying CFA calibration to these data as the contamination processes were unexplained.

Finally, the selected, uncalibrated, B40 CO data are compared with other continuous Antarctica [CO] reconstruction (Fig. S14). To ease this comparison, we further apply an arbitrary offset of -19 ppbv to the B40 data. B40 data shows a trend similar to the DC12, ABN, and TD records. Specifically, the adjusted B40 data reproduces the minimum in [CO] observed at the beginning of the XVIII century, and the 10 ppbv increases during the period extending to the onset of the Industrial Era. Although not accurate, the B40 data strengthen the pattern extracted from the calibrated record of the DC12, ABN and TD ice cores.

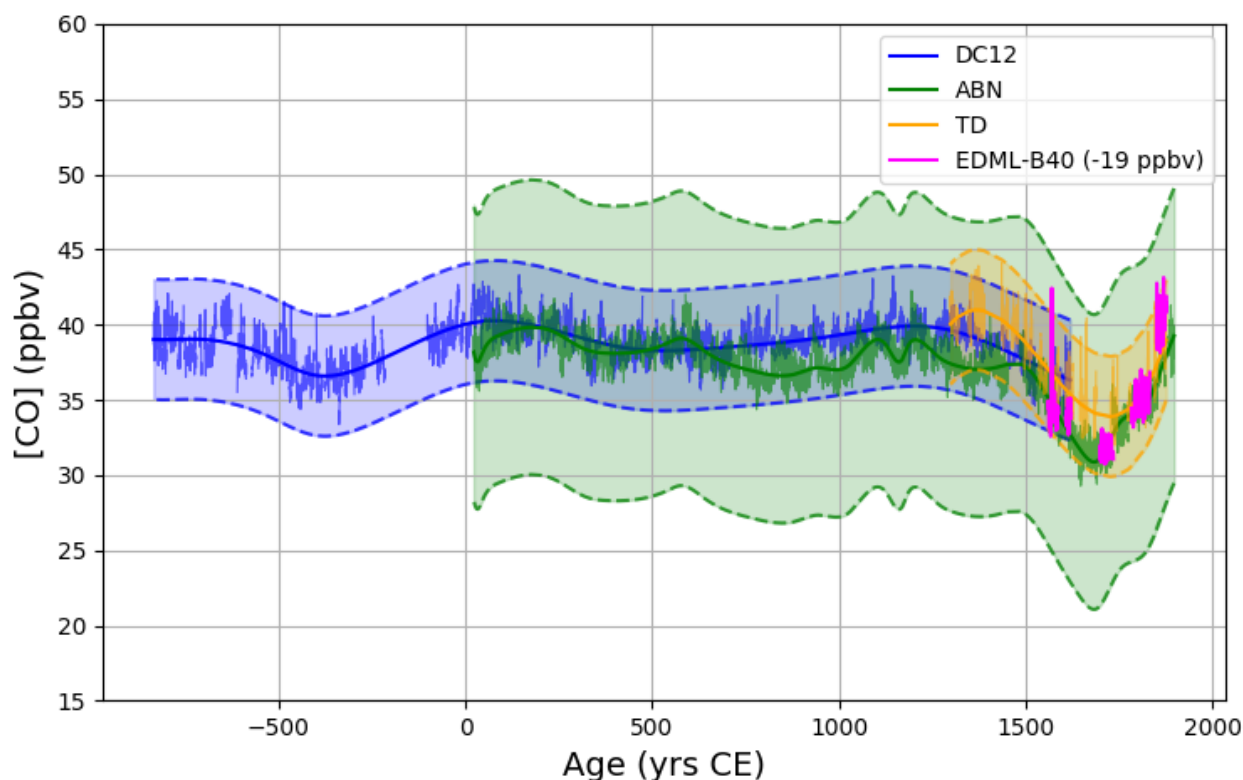

**Figure S14.** A selection of EDML-B40 [CO] data compared to continuous CO records of DC12, ABN and TD. The EDML-B40 data could not be CFA-calibrated, and were adjusted with an arbitrary offset of -19 ppbv for the purpose of this comparison.

405

## 2.7. Filling a gap in the DC12 dataset with the Solarice archive

The DC12 ice core was of extremely good quality, with very few breaks. However, a single section, spanning [154-158] m depth, was damaged during transportation and could not be analysed. To fill up this gap, we took advantage of the Solarice core, drilled in 2016 at Concordia Station (75°0.6' S, 123°2' E) closely from the DC12 drilling site

410

A Solarice core section spanning [151.0 – 158.8] m depth was analysed in January 2019 with the IGE CFA setup. Fig. S15 reports DC12 and Solarice dataset, with both cores calibrated with the same SC and Blank value (Table S2). The IGE CFA setup indeed remains unchanged between the two analytical campaigns, and the two ice cores originate from the same location.

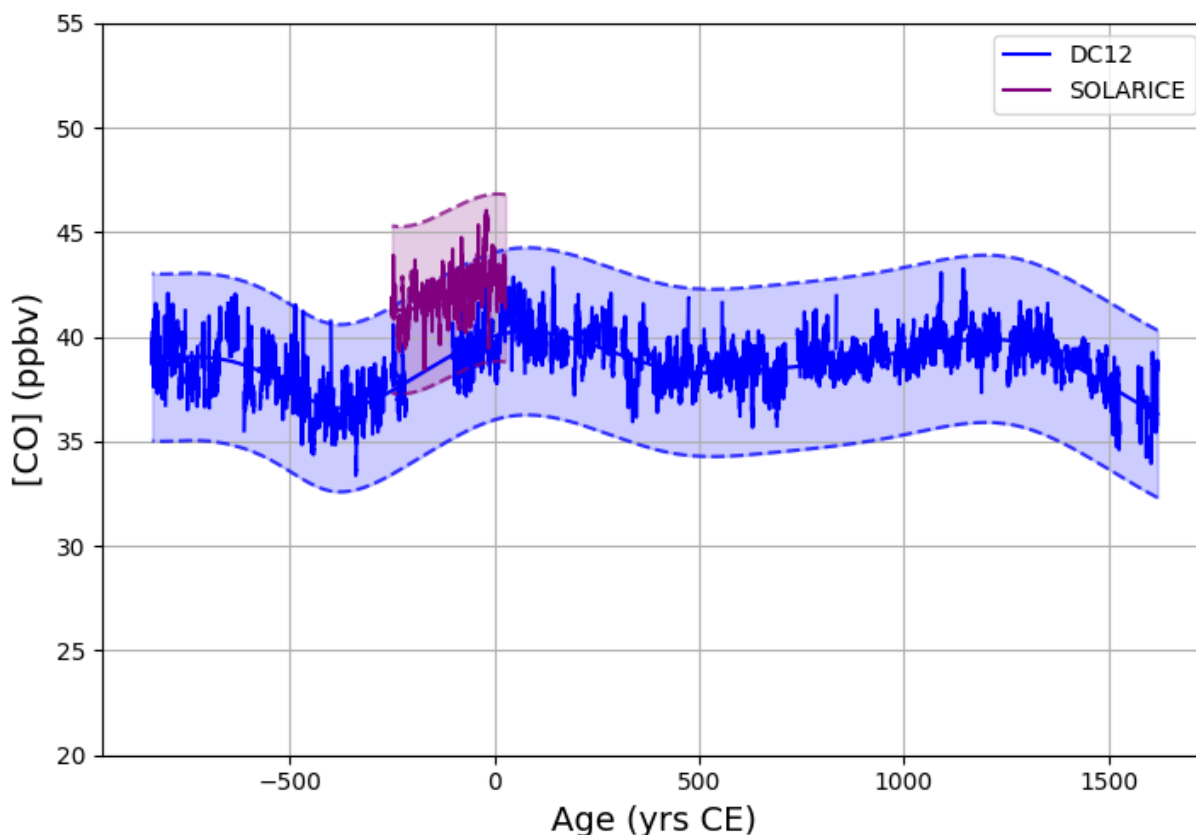

**Figure S15.** Solarice [CO] measurements conducted on the 150-158 m depth interval, overlapping with the gap in the DC12 record. Both Solarice and DC12 cores were drilled at Concordia Station (in 2016 and 2012, resp.), with boreholes located 2 km apart.

Although we observed slightly higher CO mixing ratios for Solarice compared to DC12, both records agree within their uncertainty envelope ( $2\sigma$ ). The Solarice dataset reveals that [CO] remains very stable over the [151.0 – 158.8] depth range for ice drilled at the Dome Concordia, Antarctica. Consequently, we used a continuous spline to extract an average CO history from the high resolution DC12 signals.

## 2.8. Evaluation of the smoothing effect of firn on ice core data

Using a similar approach as in Sect. 2.4 of the main article for firn data, this paragraph aims at showing that the smoothing effect from gas transport in firn and from progressive trapping in ice on the CO records in ice is insignificant. The magnitude of the smoothing is primarily dependent on the relative time scales of atmospheric variations and physical processes in firn. For instance,

CO atmospheric seasonal variations are fast compared to gas transport in firn and entirely smoothed in the upper 30-40m. On the other hand, the CO trend variations recorded in the ice for the -835 to 1897 CE period are much slower.

Gas trapping in ice bubbles is the slowest firn process: it operates at the decadal to multi-century time scales depending in first instance on the snow accumulation rate at the study site, which controls the sinking speed of firn layers. Among our ice core study sites, the strongest smoothing effect is thus expected at Dome C. Two approaches are used to evaluate the smoothing of the CO signal: (1) A forward model approach comparing the results obtained at our three sites when using the ice core signal + firn based reconstruction as the atmospheric input trend and (2) an inverse model approach constrained with the ice core data in order to reconstruct an atmospheric signal. Although more relevant, the inverse model approach has a major limit: it is a multiple solutions mathematical problem (Rommelaere et al., 1997, Witrant and Martinerie, 2013). The result is strongly dependent on the ability of the model to discriminate between signal and noise in the data, as very well illustrated by Fig. 11 in Rommelaere et al. (1997).

As expected, the forward model approach (Fig. S16) produces a slightly smoother signal at Dome C than other sites. The IGE-GIPSA model has not been directly tuned to ABN and TD, thus drill sites with similar accumulation rates were used: South Pole ( $7.4 \text{ cm weq. yr}^{-1}$ ) instead of TD ( $8.6 \text{ cm weq. yr}^{-1}$ ) and BKN ( $13.0 \text{ cm weq. yr}^{-1}$ ) instead of ABN ( $11.9 \text{ cm weq. yr}^{-1}$ ). The model results for South Pole and Berkner remain very close to the input spline signal whereas Dome C signal suggest that some smoothing is occurring. The smoothing is most pronounced around the 1700 CO minimum, which is not part of the Dome C ice core record as it is too close to the bubble closure zone. All results remain well within the uncertainty envelope of the spline fit to the ice core data.

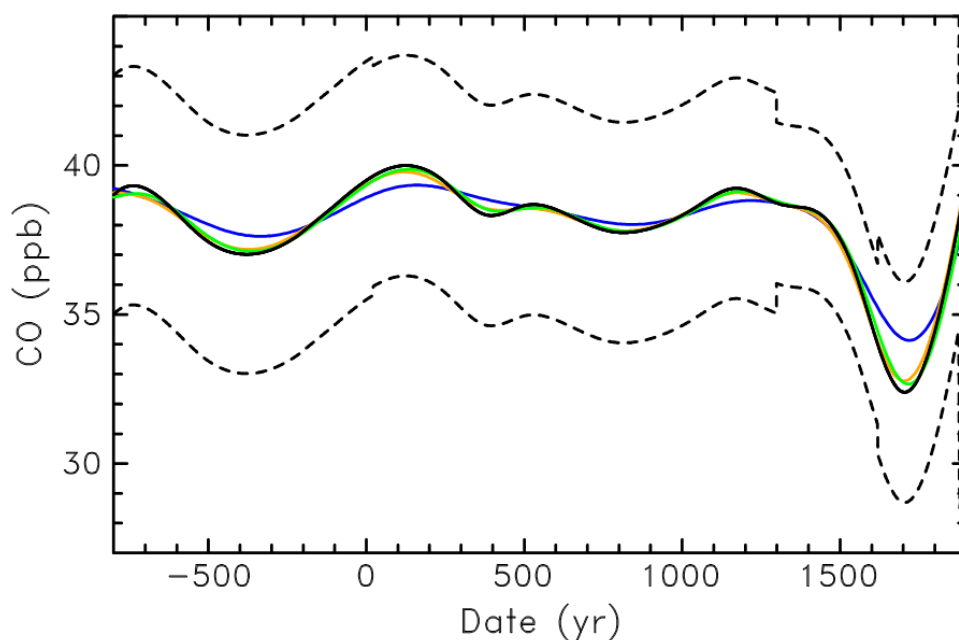

455 **Figure S16.** Forward firm model results in ice using the spline fit to ice core data (in black) as atmospheric input. In order to run the model until present day, the spline was combined with the atmospheric scenario reconstructed from firn air data for recent decades. Modelled mixing ratios in the ice are plotted versus gas age in blue for Dome C, orange for South Pole (representative of TD) and green for BKN (representative of ABN).

460

Two ways of forcing the inverse model, in Dome C configuration, were used (Fig. S17). First the model was directly constrained by the DC12 CO dataset binned at a 4 cm resolution. The reconstructed atmospheric trend (dark blue) is slightly smoother than the spline fit to the overall fit to the 3 sites dataset (in black) also based on higher accumulation sites. The model was further

465 constrained with the spline fit, but its ability to properly discriminate signal and noise is more uncertain in this case. This leads to the slightly less smooth light blue trend on Fig. S17 which also remains within the uncertainty envelope of the data. Consistently with the forward model approach, the largest difference is observed near the CO minimum at ~1700 CE. However, the spline fit of the data is not constrained by Dome C data in that time period and Figure S16

470 suggests very limited smoothing at the other sites.

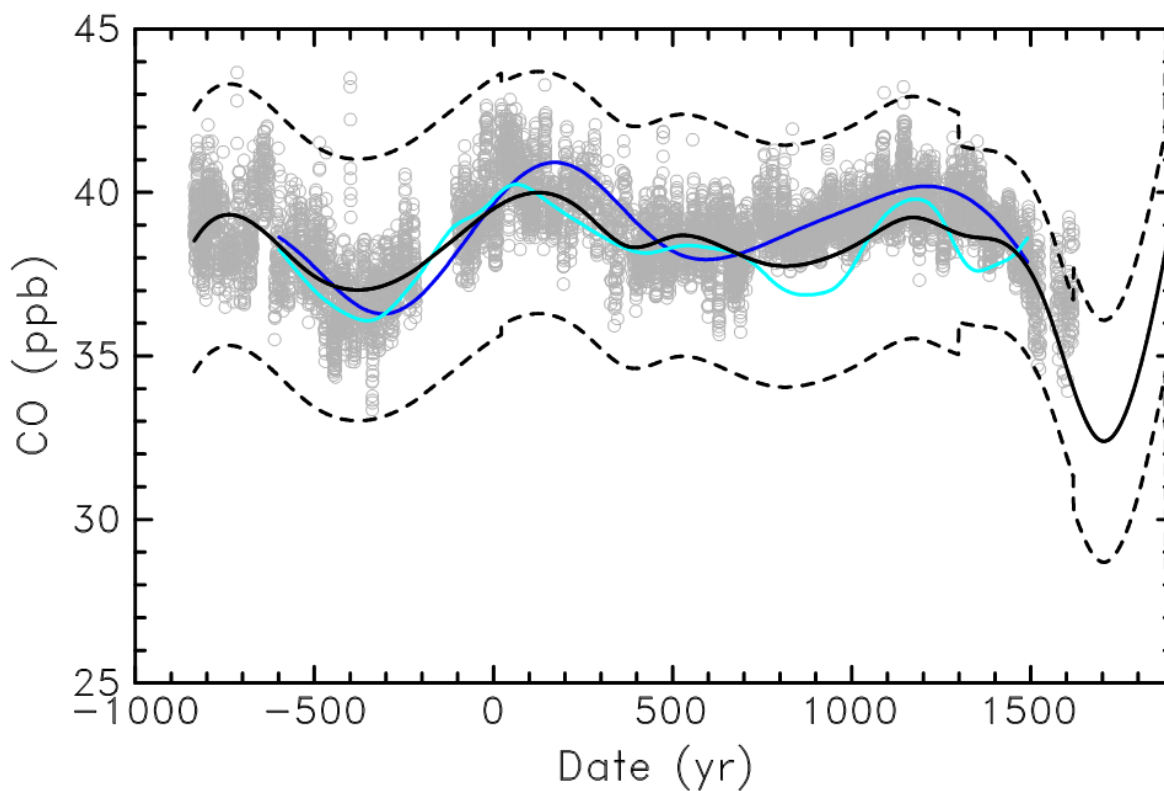

**Figure S17.** Inverse model reconstructions of atmospheric CO trend using Dome C firn physics conditions constrained with (i) the Dome C dataset binned at 4 cm resolution (grey circles) which leads to the smooth dark blue trend, or (ii) with the spline fit to the multi-site CO dataset (black line) leading to the light blue trend.

Overall, we conclude that no significant smoothing by firn related processes affects our spline fit to the ice core signals.

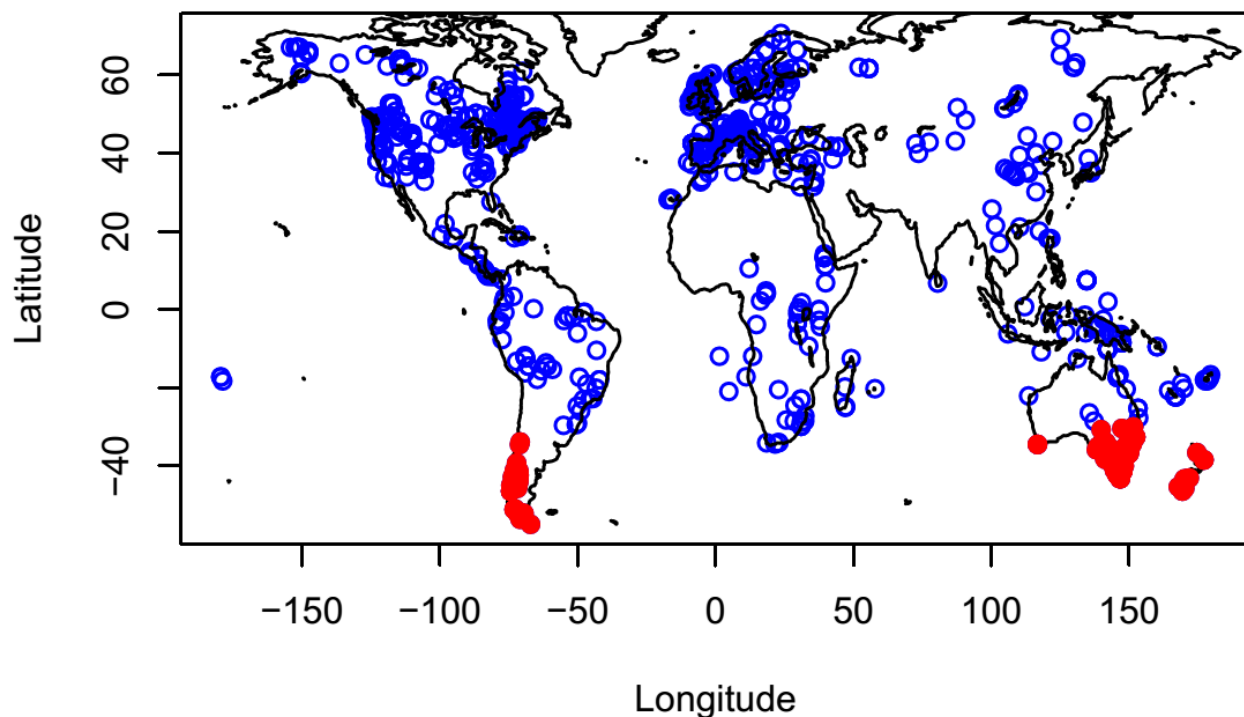

**Figure S18.** Localisation of charcoal records included in the 30-60°S Oceania, and America composites (Fig. 5). Extracted from the Global Paleofire Database (<https://database.paleofire.org>).

### 3. References

Allan, D. W.: Statistics of atomic frequency standards, *Proc. IEEE*, 54(2), 221–230, doi:10.1109/PROC.1966.4634, 1966.

495 Fabre, A., Barnola, J. M., Arnaud, L. and Chappellaz, J.: Determination of gas diffusivity in polar firn: comparison between experimental measurements and inverse modeling, *Geophys. Res. Lett.*, 27(4), 557–560, 2000.

Faïn, X., Rhodes, R. H., Place, P., Petrenko, V. V., Fourteau, K., Chellman, N., Crosier, E., McConnell, J. R., Brook, E. J., Blunier, T., Legrand, M. and Chappellaz, J.: Northern Hemisphere atmospheric history of carbon monoxide since preindustrial times reconstructed from multiple  
500 Greenland ice cores, *Clim. Past*, 18(3), 631–647, doi:10.5194/cp-18-631-2022, 2022.

Fourteau, K., Martinerie, P., Faïn, X., Ekaykin, A. A., Chappellaz, J. and Lipenkov, V.: Estimation of gas record alteration in very low-accumulation ice cores, *Clim. Past*, 16(2), 503–522, doi:10.5194/cp-16-503-2020, 2020.

505 Francey, R. J., L. P. Steele, D. A. Spencer, R. L. Langenfelds, R. M. Law, P. B. Krummel, P. J. Fraser, D. M. Etheridge, N. Derek, S. A. Coram, L. N. Cooper, C. E. Allison, L. Porter and S. Baly, The CSIRO (Australia) measurement of greenhouse gases in the global atmosphere, *Baseline Atmospheric Program (Australia) 1999-2000*, N. W. Tindale, N. Derek and P. J. Fraser (eds.), Bureau of Meteorology and CSIRO Atmospheric Research, Melbourne, Australia, 42-53, 2003.

510 Fraser, P., S. Coram and N. Derek (1994), Atmospheric methane, carbon monoxide and carbon dioxide by gas chromatography, *Baseline Atmospheric Program (Australia) 1991*, A. L. Dick and J. L. Gras (eds.), Bureau of Meteorology and CSIRO Division of Atmospheric Research, Melbourne, Australia, 60-64

515 Gautier, E., Savarino, J., Erbland, J., Lanciki, A. and Possenti, P.: Variability of sulfate signal in ice core records based on five replicate cores, *Clim. Past*, 12(1), 103–113, doi:10.5194/cp-12-103-2016, 2016.

Klein, K.: Variability in dry Antarctic firn – Investigations on spatially distributed snow and firn samples from Dronning Maud Land, Antarctica, PhD thesis, University of Bremen, Bremen, Germany, 2014.

520 Langenfelds, R. L., Guerette E-A., Steele L. P., Krummel P. B., Spencer D. A., Loh Z. M., Gregory R. L., Thornton D. P., Howden R. T. and Fraser P. J.: Atmospheric methane, carbon dioxide, carbon monoxide, hydrogen and nitrous oxide from Cape Grim flask samples analysed by gas chromatography, in *Baseline Atmospheric Program (Australia)*, 2014-16, R. Langenfelds, N. Derek and S. L. Cleland (eds.), Bureau of Meteorology and CSIRO Environment, Melbourne, Australia, 2023.

525 Loh, Z., Langenfelds, R., Krummel, P.: Atmospheric CO at Casey by Commonwealth Scientific and Industrial Research Organisation, dataset published as CO\_CYA\_surface-flask\_CSIRO\_data1 at WDCGG, ver.2021-04-08-1004, [https://doi.org/10.50849/WDCGG\\_0016-7004-3001-01-02-9999](https://doi.org/10.50849/WDCGG_0016-7004-3001-01-02-9999), 2021a.

530 Loh, Z., Langenfelds, R., Krummel, P.: Atmospheric CO at South Pole by Commonwealth Scientific and Industrial Research Organisation, dataset published as CO\_SPO\_surface-

flask\_CSIRO\_data1 at WDCGG, ver.2021-04-08-1004, [https://doi.org/10.50849/WDCGG\\_0016-7011-3001-01-02-9999](https://doi.org/10.50849/WDCGG_0016-7011-3001-01-02-9999), 2021b.

Loh, Z., Langenfelds, R., Krummel, P.: Atmospheric CO at Mawson by Commonwealth Scientific and Industrial Research Organisation, dataset published as CO\_MAA\_surface-flask\_CSIRO\_data1 at WDCGG, ver.2021-04-08-1004, [https://doi.org/10.50849/WDCGG\\_0016-7005-3001-01-02-9999](https://doi.org/10.50849/WDCGG_0016-7005-3001-01-02-9999), 2021c.

Masarie, K. A., R. L. Langenfelds, C. E. Allison, T. J. Conway, E. J. Dlugokencky, R. J. Francey, P. C. Novelli, L. P. Steele, P. P. Tans, B. Vaughn and J. W. C. White, NOAA/CSIRO Flask Air Intercomparison Experiment: A strategy for directly assessing consistency among atmospheric measurements made by independent laboratories, *J. Geophys. Res.*, 106, 20445–20464, 2001.

Mitchell, L. E., Brook, E. J., Lee, J. E., Buizert, C. and Sowers, T.: Constraints on the late holocene anthropogenic contribution to the atmospheric methane budget, *Science*, 342(6161), 964–6, doi:10.1126/science.1238920, 2013.

Morville, J., Kassi, S., Chenevier, M. and Romanini, D.: Fast, low-noise, mode-by-mode, cavity-enhanced absorption spectroscopy by diode-laser self-locking, *Appl. Phys. B-Lasers Opt.*, 80(8), 8 1027–1038, doi:10.1007/s00340-005-1828-z, 2005.

Rhodes, R. H., Faïn, X., Brook, E. J., McConnell, J. R., Maselli, O. J., Sigl, M., Edwards, J. S., Buizert, C., Blunier, T., Chappellaz, J. and Freitag, J.: Local artifacts in ice core methane records caused by layered bubble trapping and in situ production: a multi-site investigation, *Clim. Past*, 12(4), 1061–1077, doi:10.5194/cp-12-1061-2016, 2016.

Rommelaere, V., Arnaud, L., and Barnola, J.-M. (1997), Reconstructing recent atmospheric trace gas concentrations from polar firn and bubbly ice data by inverse methods, *J. Geophys. Res.*, 102(D25), 30069– 30083, doi:10.1029/97JD02653.

Servettaz, A. P. M., Orsi, A. J., Curran, M. A. J., Moy, A. D., Landais, A., McConnell, J. R., Popp, T. J., Le Meur, E., Faïn, X. and Chappellaz, J.: A 2000-year temperature reconstruction on the East Antarctic plateau, from argon-nitrogen and water stable isotopes in the Aurora Basin North ice core, *Clim. Past Discuss.*, 2022, 1–58, doi:10.5194/cp-2022-91, 2022.

- Trudinger, C. M., Enting, I. G., Rayner, P. J., Etheridge, D. M., Buizert, C., Rubino, M., Krummel, P. B. and Blunier, T.: How well do different tracers constrain the firn diffusivity profile?, *Atmos. Chem. Phys.*, 13(3), 1485–1510, doi:10.5194/acp-13-1485-2013, 2013.
- Trudinger, C. M., Fraser, P. J., Etheridge, D. M., Sturges, W. T., Vollmer, M. K., Rigby, M., Martinerie, P., Mühle, J., Worton, D. R., Krummel, P. B., Steele, L. P., Miller, B. R., Laube, J., Mani, F. S., Rayner, P. J., Harth, C. M., Witrant, E., Blunier, T., Schwander, J., O'Doherty, S. and Battle, M.: Atmospheric abundance and global emissions of perfluorocarbons CF<sub>4</sub>, C<sub>2</sub>F<sub>6</sub> and C<sub>3</sub>F<sub>8</sub> since 1800 inferred from ice core, firn, air archive and in situ measurements, *Atmos. Chem. Phys.*, 16(18), 11733–11754, doi:10.5194/acp-16-11733-2016, 2016.
- Werle, P., Mücke, R. and Slemr, F.: The Limits of Signal Averaging in Atmospheric Trace-Gas Monitoring by Tunable Diode-Laser Absorption Spectroscopy ( TDLAS ), *Appl. Phys. B-Lasers Opt.*, 139, 131–139, 1993.
- Witrant, E., Martinerie, P., Hogan, C., Laube, J. C., Kawamura, K., Capron, E. and Montzka, S. A., E. J. Dlugokencky, D. Etheridge, T. Blunier, and W. T. Sturges: A new multi-gas constrained model of trace gas non-homogeneous transport in firn : evaluation and behaviour at eleven polar sites, *Atmos. Chem. Phys.*, (12), 11465–11483, doi:10.5194/acp-12-11465-2012, 2012.
- Witrant, E. and Martinerie, P.: Input Estimation from Sparse Measurements in LPV Systems and Isotopic Ratios in Polar Firns, in 2013 IFAC Joint Conference SSSC, pp. 654–659, 5th Symposium on System Structure and Control, Grenoble, France, 2013.
